# Supplementary material for: Glycation of macrophages induces expression of pro-inflammatory cytokines and reduces phagocytic efficiency
Source: publisher site journal article supplement (doi:10.18632/aging.102123), 2019-07-29
Supplement: Supplementary file [file aging-v11i14-102123-supplementary-material-SD1.pdf]

## SUPPLEMENTARY MATERIAL

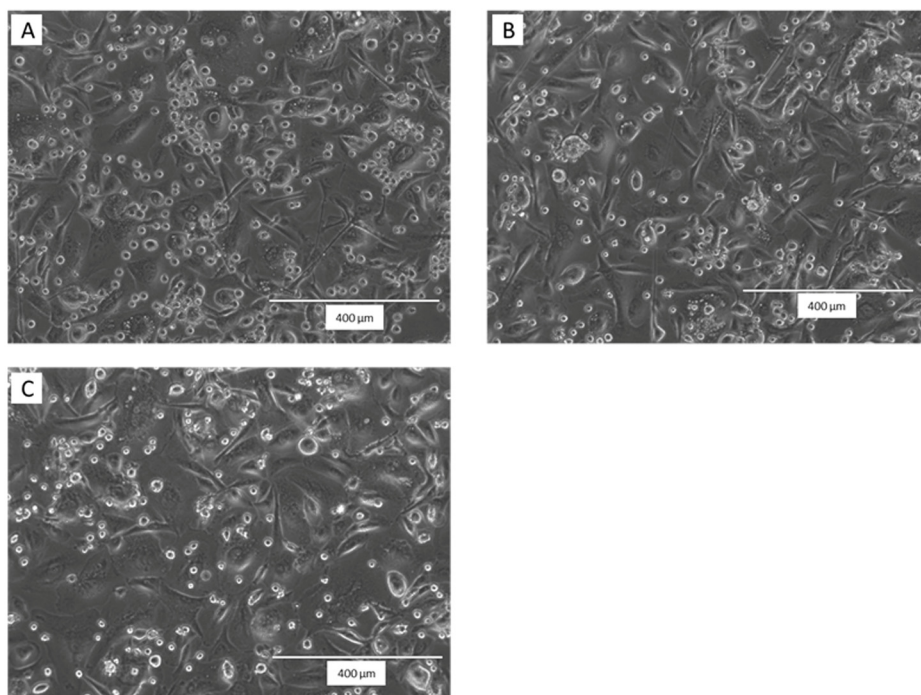

**Supplementary Figure 1. Micrographs of macrophages after glycation.** Bright field microscopy of THP-1 macrophages (M0) was done after incubation with different MGO concentrations for 24 h in culture medium. (A) control; (B) 0.5 mM; (C) 1 mM. Scale bar indicates 400  $\mu$ m. Representative micrographs of three different experiments.

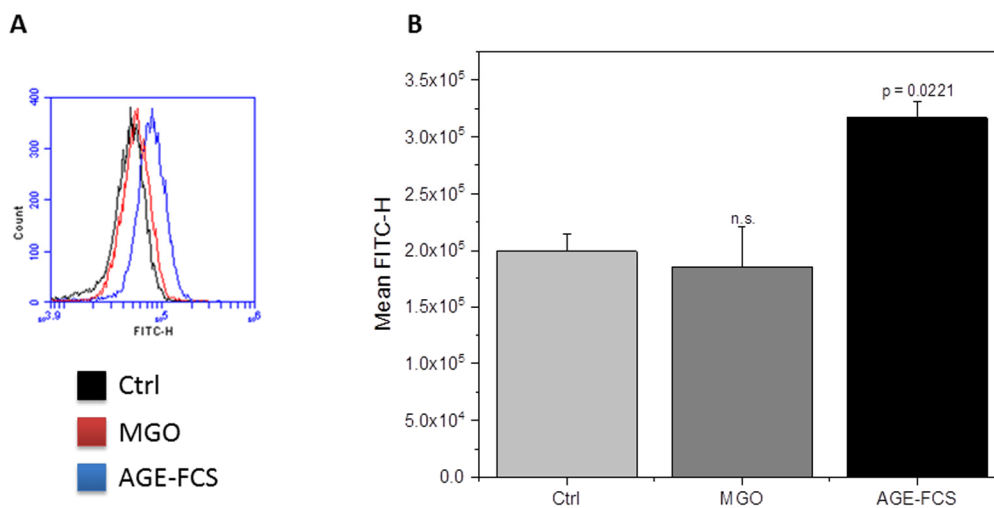

**Supplementary Figure 2. Flow cytometry staining of RAGE.** THP-1 macrophages (M0) were incubated with 1 mM MGO or 10% AGE-FCS for 24 h in normal growth medium. Living cells were stained with an anti-RAGE antibody (ab3611) and secondary FITC labeled antibody and analyzed using flow cytometry. (A) Representative histogram of analyzed FITC positive macrophages. (B) Graph of mean fluorescence intensity of stained macrophages, data represents mean + SD of 3 independent experiments.

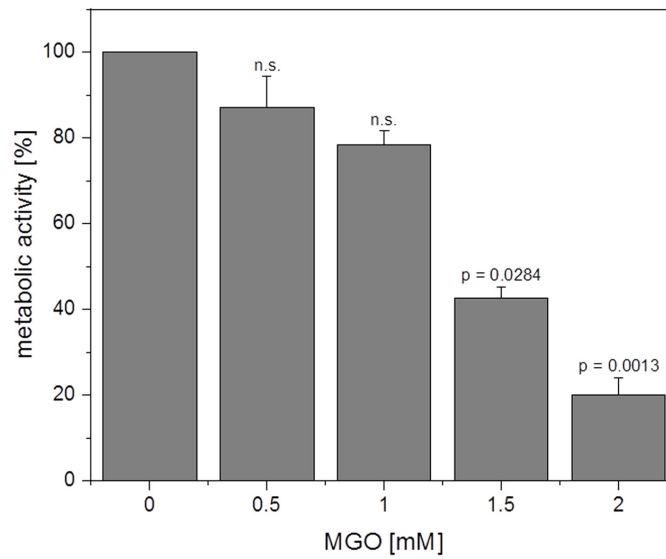

**Supplementary Figure 3. Metabolic activity after glycation.** THP-1 macrophages (M0) were treated with different concentrations of MGO for 24 h in normal growth medium and MTT assay was performed. Cells without MGO treatment were set to 100% of metabolic activity. Data represents average mean of metabolic activity + SD of 4 independent experiments.

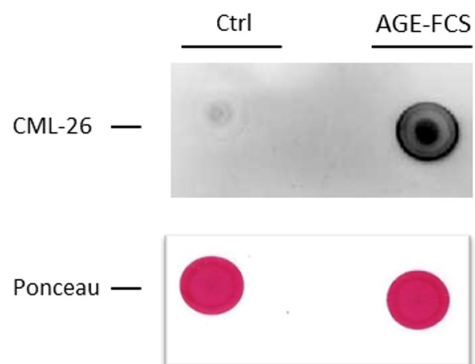

**Supplementary Figure 4. Glycation of AGE-FCS.** Glycation of AGE-FCS was verified via dot blot using an anti-AGE antibody (CML-26). Shown blot is representative for 3 independent experiments.
